# Supplementary material for: Green preparation of novel heptafluo-zirconate/hafnate nanocrystals at ambient temperature
Source: Royal Society of Chemistry journal article supplement (doi:10.1039/c5nj02736e), 2015-12-16
Supplement: c5nj02736e1.pdf [file c5nj02736e1.pdf]

## Electronic Supplementary Information

# Green Preparation of Novel Heptafluoro-zirconate/hafnate Nanocrystals at Ambient Temperature

Xianghong He,\* Jinxin Cao and Ziyi Hu

School of Chemistry and Environmental Engineering, Jiangsu University of Technology,  
Changzhou, Jiangsu 213001, China

\* Corresponding Author: Email: [hexh@jsut.edu.cn](mailto:hexh@jsut.edu.cn)

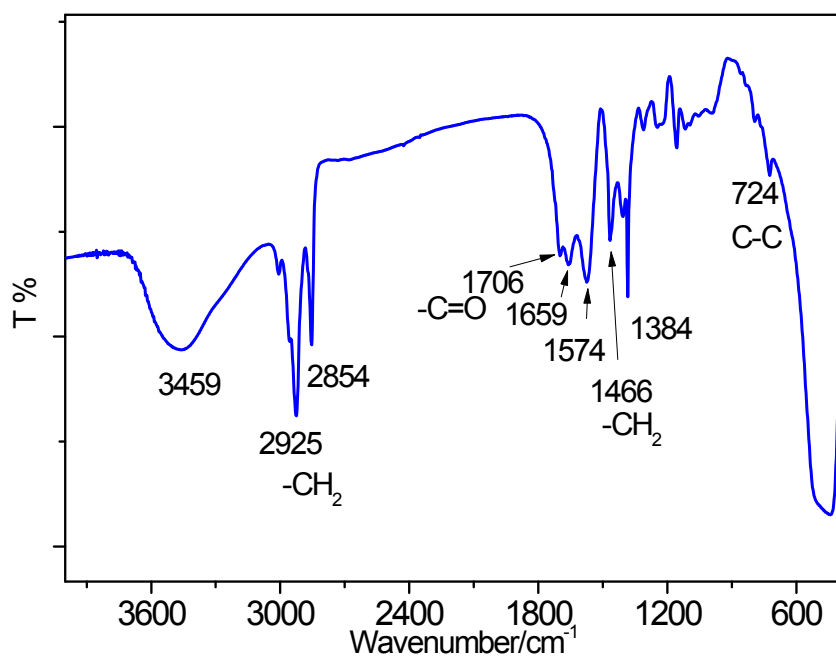

Figure S1 FT-IR spectrum of as-obtained  $K_3ZrF_7:Eu^{3+}$  sample

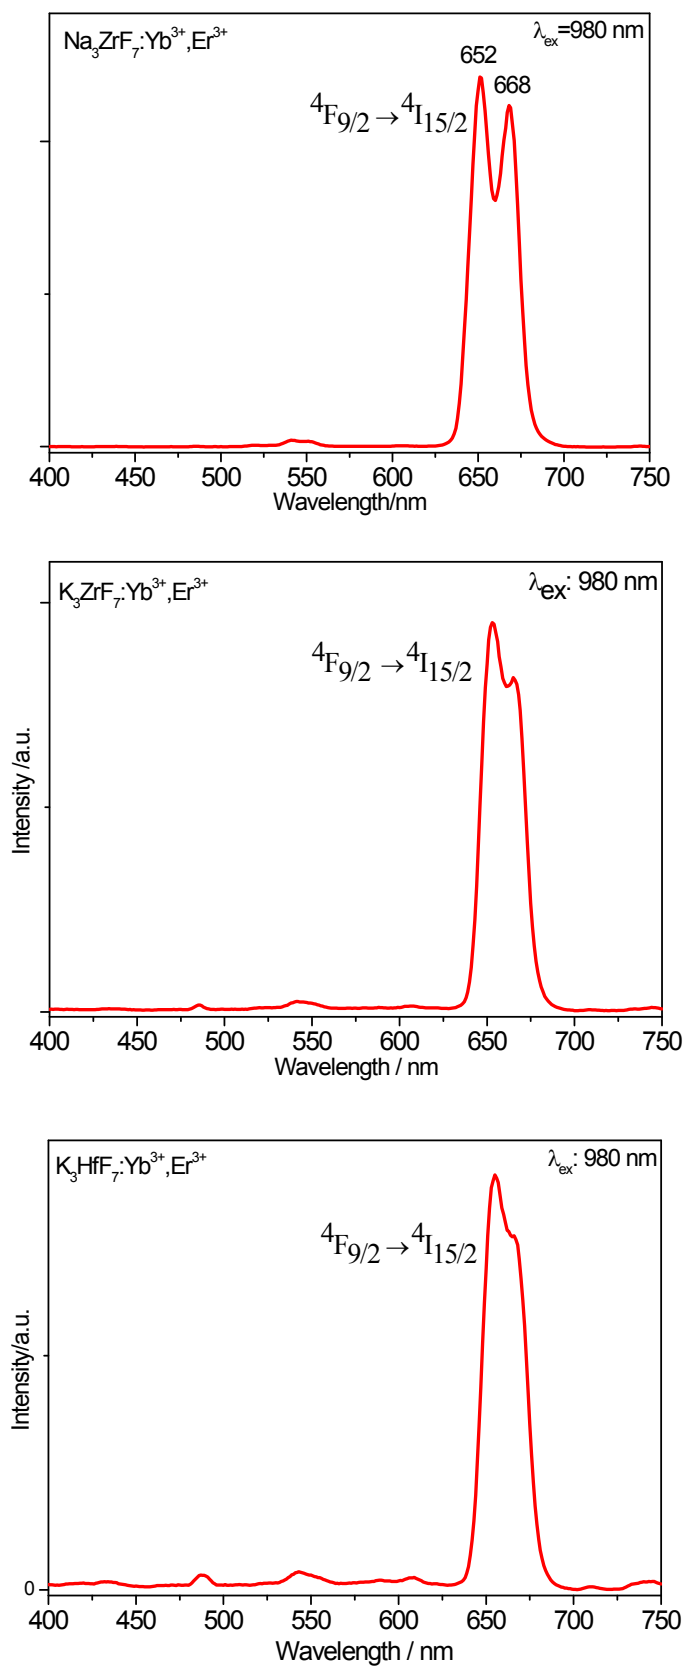

Figure S2 Up-conversion emission spectra of  $A_3MF_7:Yb^{3+},Er^{3+}$  (20/2 mol%) (A=Na, K, M = Zr, Hf) NCs
